# Supplementary material for: A “one-for-three” strategy through a facile one-step hydrothermal engineering of commercial MoO3 for high-performance proton storage
Source: Royal Society of Chemistry journal article supplement (doi:10.1039/d1ta10492f), 2022-01-01
Supplement: d1ta10492f1.pdf [file d1ta10492f1.pdf]

Supporting Information for

**A “one-for-three” Strategy through a Facile One-step Hydrothermal Engineering of Commercial MoO<sub>3</sub> for High-Performance Proton Storage**

Weifeng Liu,<sup>a</sup> Zhi Zhang,<sup>\*a</sup> Junjie Shi,<sup>a</sup> Yifan Zheng,<sup>a</sup> Yonghui Wu,<sup>a</sup> Xiutao Fu,<sup>a</sup> Nishuang Liu,<sup>a</sup> Jun Su<sup>a</sup>  
and Yihua Gao<sup>a</sup>

<sup>a</sup> *School of Physics & Wuhan National Laboratory for Optoelectronics (WNLO), Huazhong University of Science and Technology (HUST), Luoyu Road 1037, Wuhan 430074, P. R. China.*

*E-mail: zzhang@hust.edu.cn*

### Calculation of specific gravimetric capacitance, energy density and power density

The specific of gravimetric capacitance are determined by the following calculation

formulas:

$$C_s = \frac{I \times \Delta t}{m \times \Delta V} \quad (1)$$

Where  $C_s$  ( $F g^{-1}$ ) is the specific gravimetric capacitance,  $I$  ( $A$ ) is the discharge current,  $\Delta t$  ( $s$ ) is the discharge time,  $m$  ( $g$ ) is the full mass of the active materials.

The energy density and power density of the electrode in the symmetric supercapacitor is calculated by the following equation:

$$E = \frac{1}{2 \times 3.6} C_s \Delta V^2 \quad (2)$$

$$P = \frac{3600 \times E}{\Delta t} \quad (3)$$

$E$  ( $Wh kg^{-1}$ ) and  $P$  ( $W kg^{-1}$ ) are the energy density and power density, respectively.

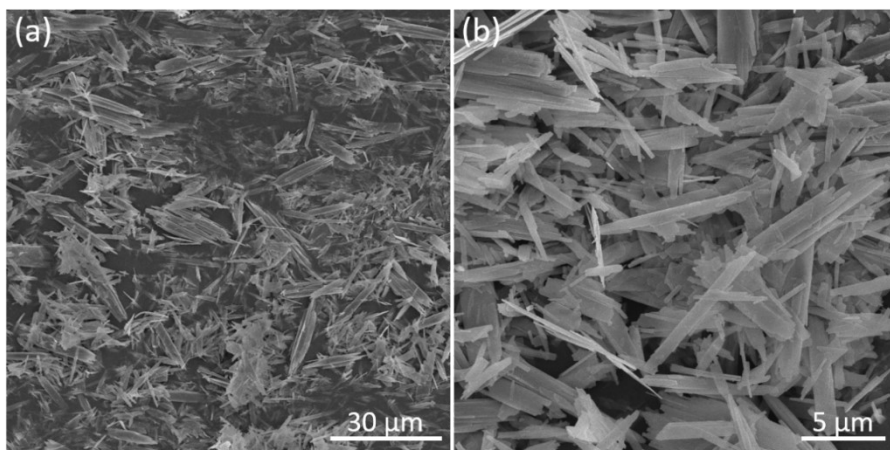

**Fig. S1** (a, b) SEM images of P0-MoO<sub>3</sub> at different magnifications.

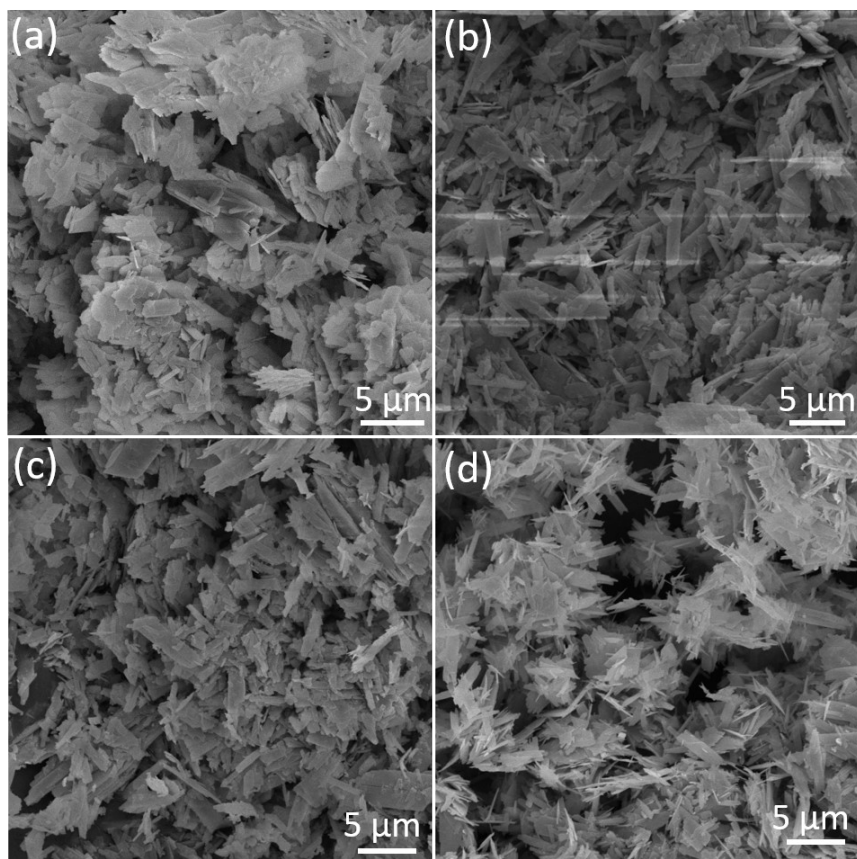

**Fig. S2** SEM images of (a) P50-MoO<sub>3</sub>, (b) P150-MoO<sub>3</sub>, (c) P300-MoO<sub>3</sub>, and (d) P500-MoO<sub>3</sub>.

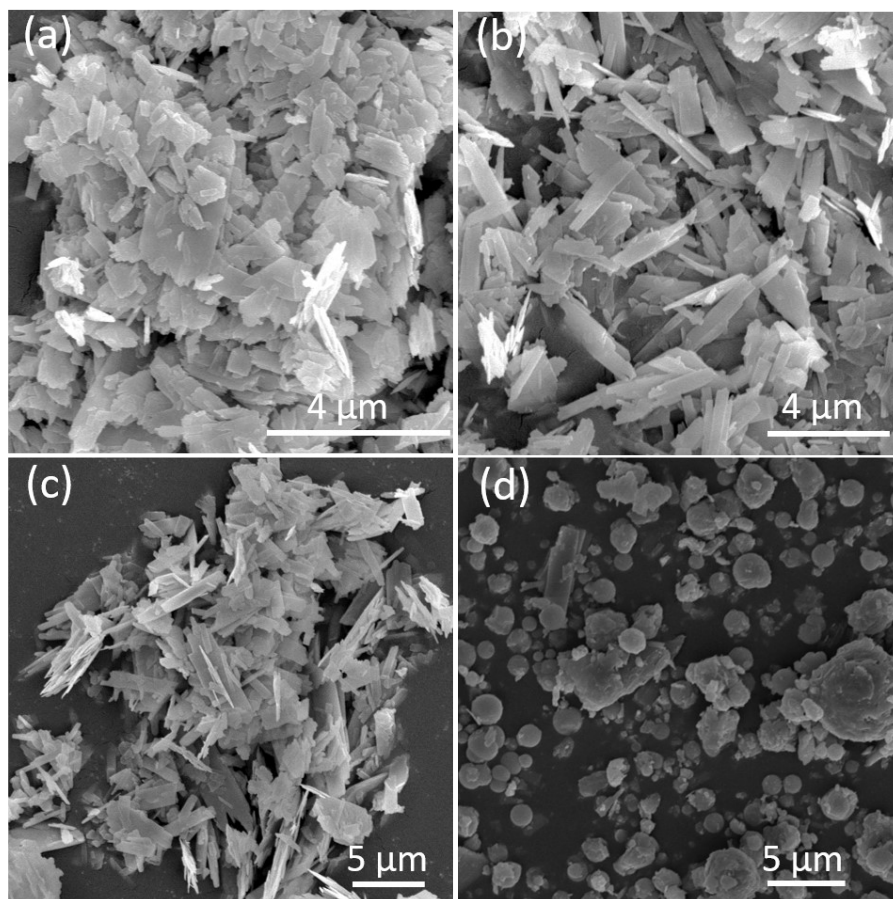

**Fig. S3** SEM images of (a) PANI-MoO<sub>3</sub>-80, (b) P100-MoO<sub>3</sub>, (c) PANI-MoO<sub>3</sub>-160, and (d) PANI-MoO<sub>3</sub>-200.

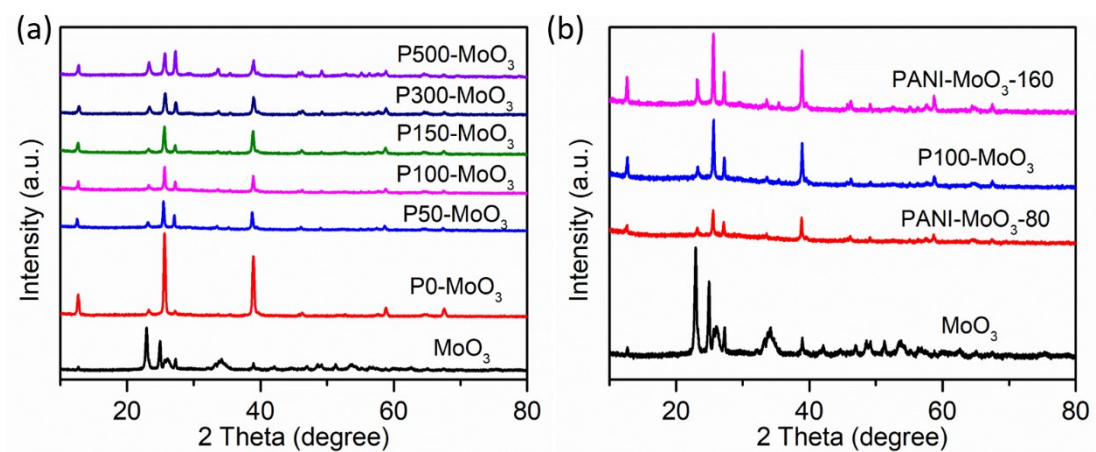

**Fig. S4** XRD curves of MoO<sub>3</sub> with different (a) aniline monomers, and (b) hydrothermal temperatures.

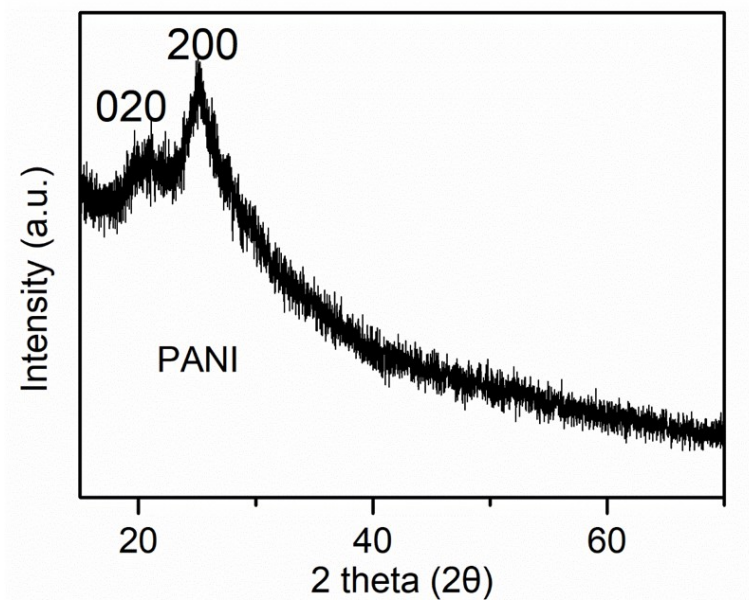

**Fig. S5** XRD pattern of PANI.

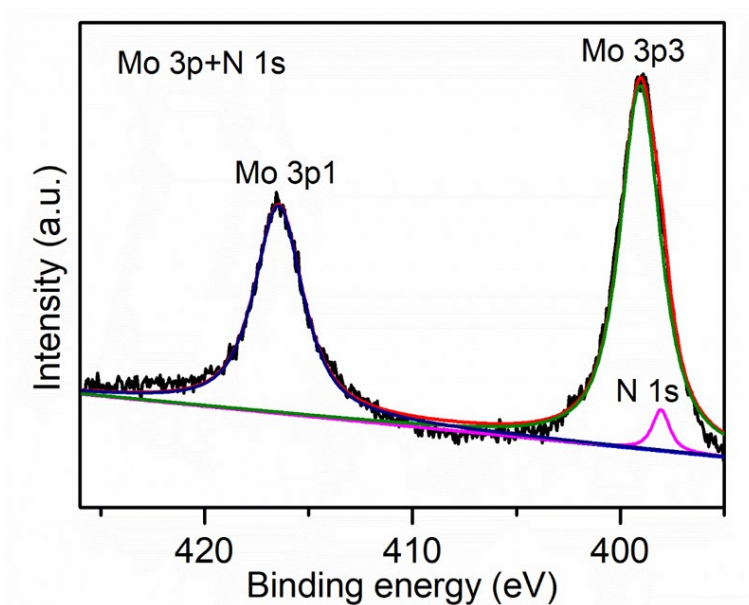

**Fig. S6** XPS of P100-MoO<sub>3</sub> showing the Mo 3p and N1s.



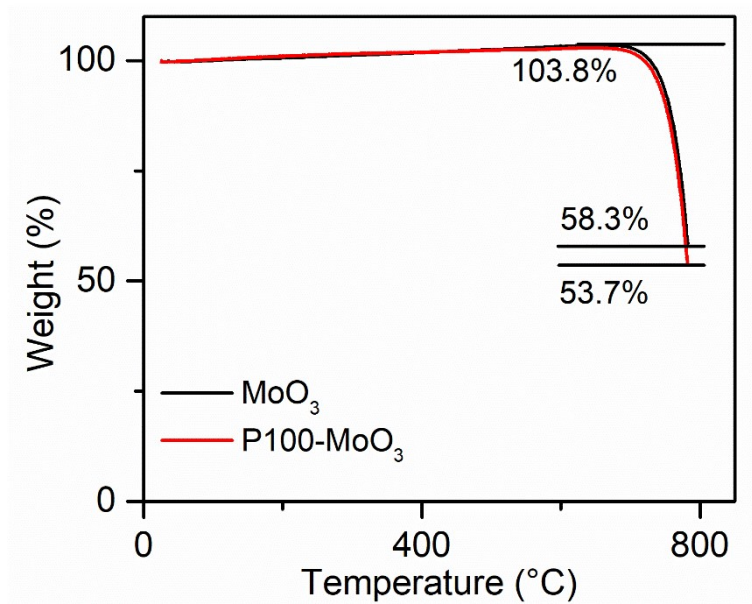

**Fig. S7** Thermogravimetric analysis (TGA) of pristine MoO<sub>3</sub> and P100-MoO<sub>3</sub>.

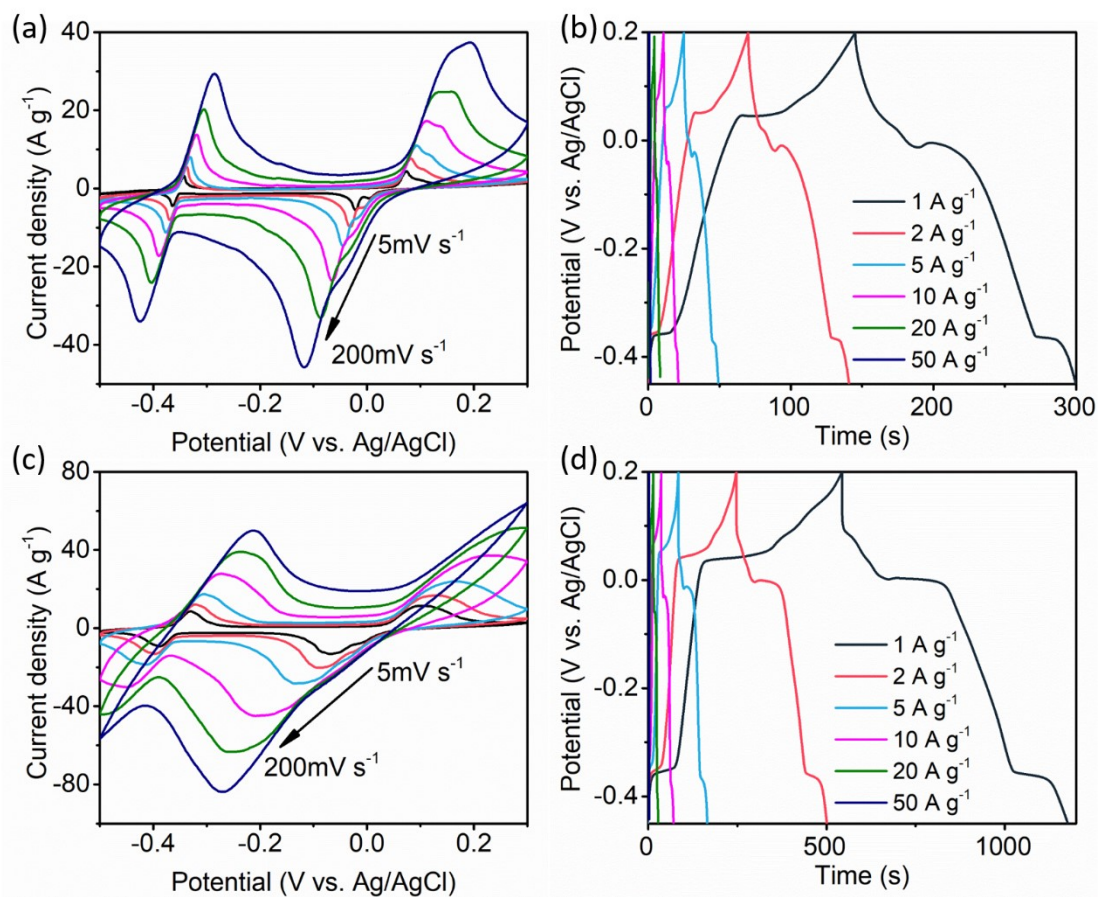

**Fig. S8** CV curves of (a) MoO<sub>3</sub> and (c) P0-MoO<sub>3</sub>. GCD curves of (b) MoO<sub>3</sub> and (d) P0-MoO<sub>3</sub>.

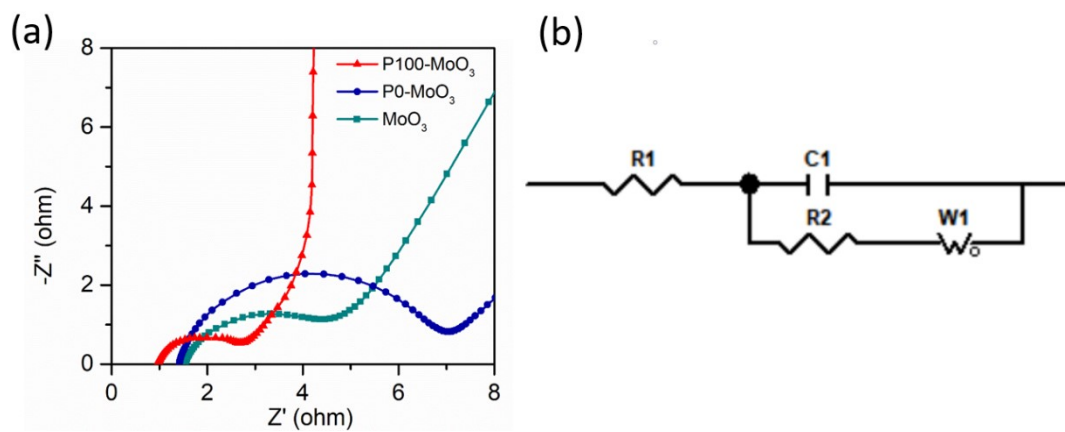

**Fig. S9** (a) Magnified high frequency region of the Nyquist plot. (b) Equivalent circuit for the fitting of P100-MoO<sub>3</sub> EIS spectrum.

**Table S1** Resistance and hydrogen-ion diffusion coefficient ( $D_{H^+}$ ) of MoO<sub>3</sub>, P0-MoO<sub>3</sub>, and P100-MoO<sub>3</sub> fitting/calculated from the EIS spectra.

| Materials             | $R_s$ ( $\Omega$ ) | $R_{ct}$ ( $\Omega$ ) | $R_w$ ( $\Omega$ ) | $D_{H^+}$ ( $\text{cm}^2 \text{s}^{-1}$ ) |
|-----------------------|--------------------|-----------------------|--------------------|-------------------------------------------|
| MoO <sub>3</sub>      | 1.622              | 1.833                 | 4.038              | $2.62 \times 10^{-12}$                    |
| P0-MoO <sub>3</sub>   | 1.503              | 4.114                 | 3.853              | $5.93 \times 10^{-12}$                    |
| P100-MoO <sub>3</sub> | 1.01               | 1.077                 | 1.924              | $1.88 \times 10^{-10}$                    |

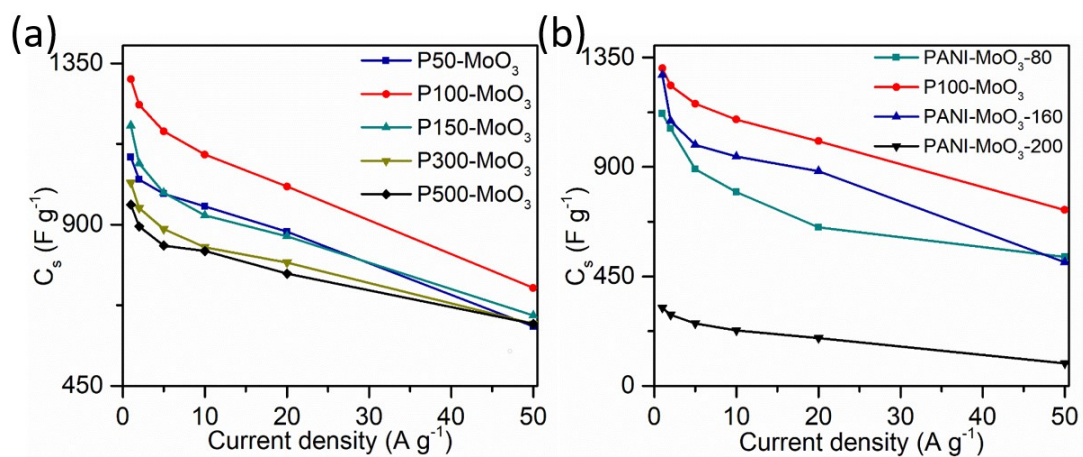

**Fig. S10** The compared specific capacitance with different (a) amount of aniline monomers, and (b) hydrothermal temperatures.

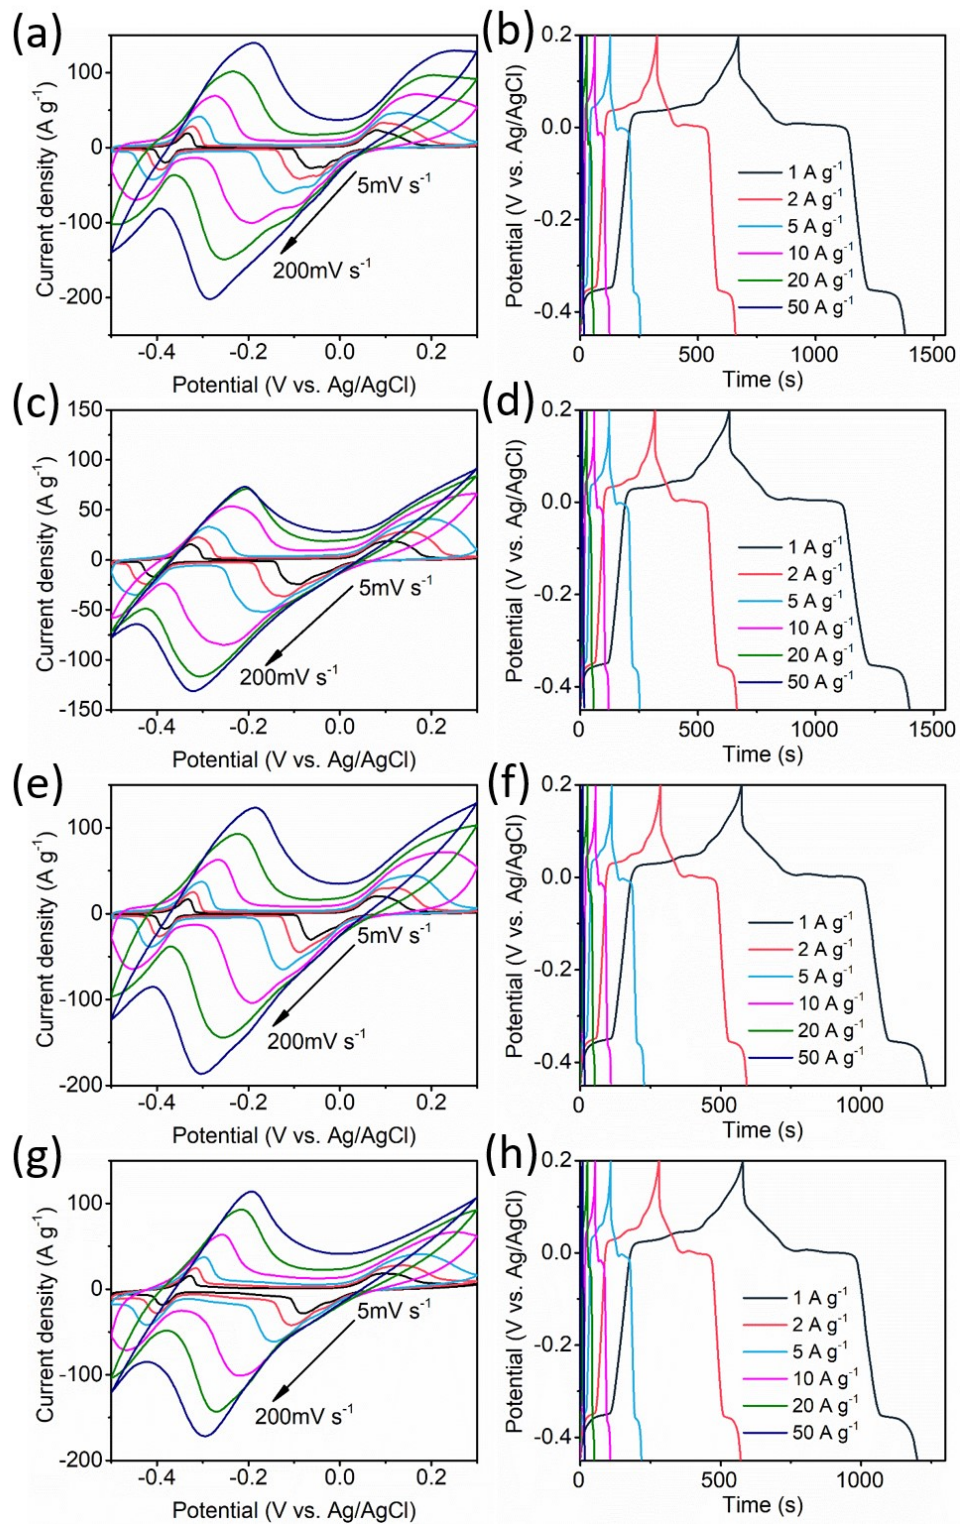

**Fig. S11** CV curves of (a) P50- $\text{MoO}_3$ , (c) P150- $\text{MoO}_3$ , (e) P300- $\text{MoO}_3$  and (g) P500- $\text{MoO}_3$ . GCD curves of (b) P50- $\text{MoO}_3$ , (d) P150- $\text{MoO}_3$ , (f) P300- $\text{MoO}_3$  and (h) P500- $\text{MoO}_3$ .



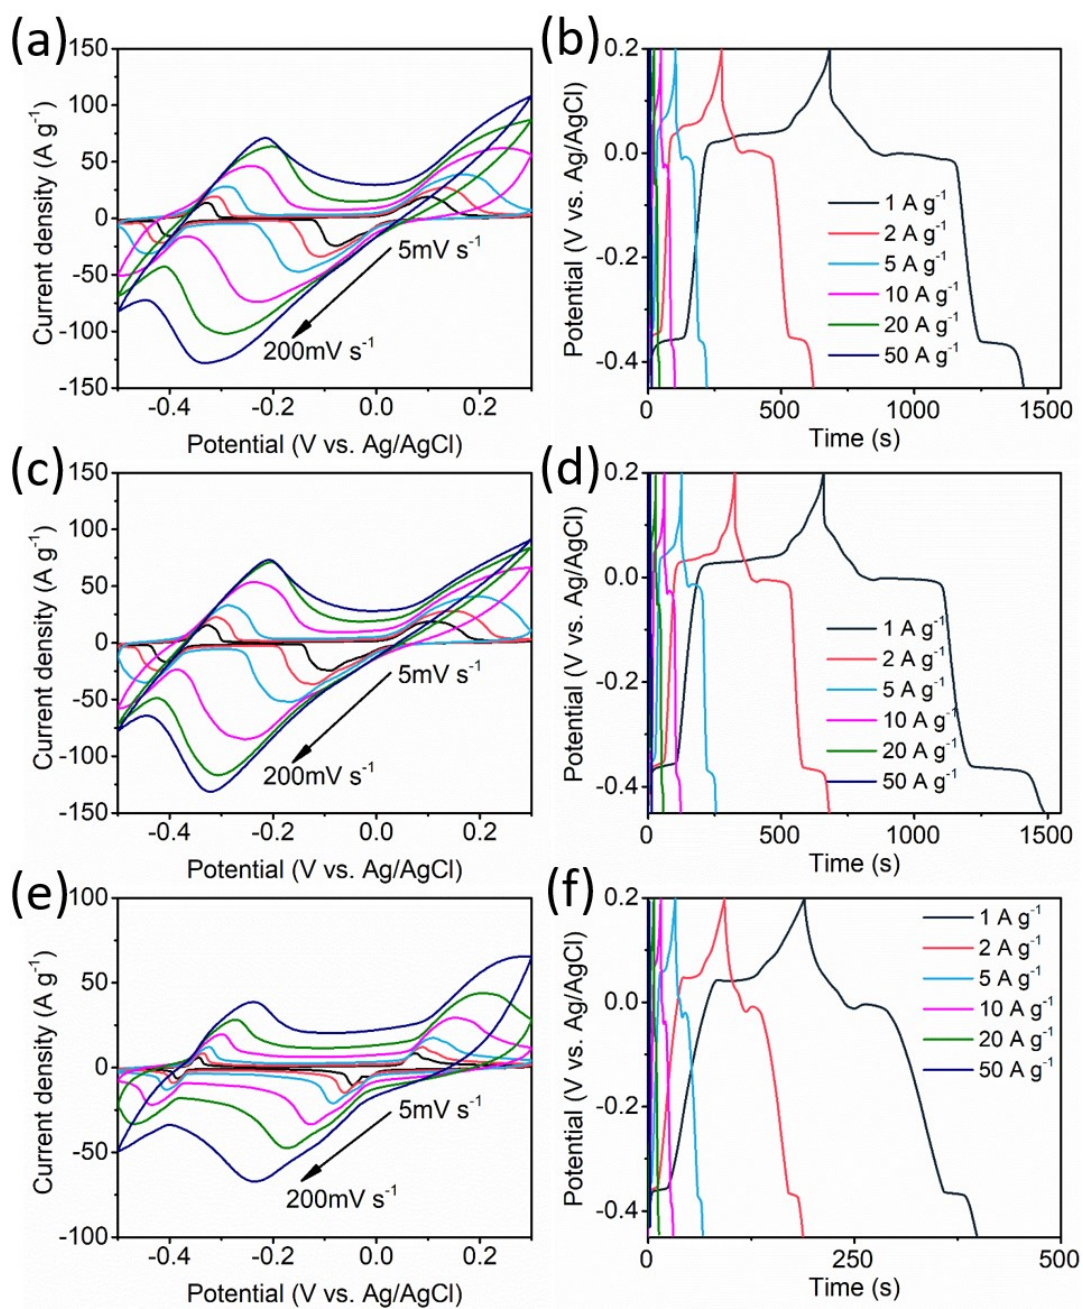

**Fig. S12** CV curves of (a) PANI-MoO<sub>3</sub>-80, (c) PANI-MoO<sub>3</sub>-160 and (e) PANI-MoO<sub>3</sub>-200. GCD curves of (b) PANI-MoO<sub>3</sub>-80, (d) PANI-MoO<sub>3</sub>-160 and (f) PANI-MoO<sub>3</sub>-200.

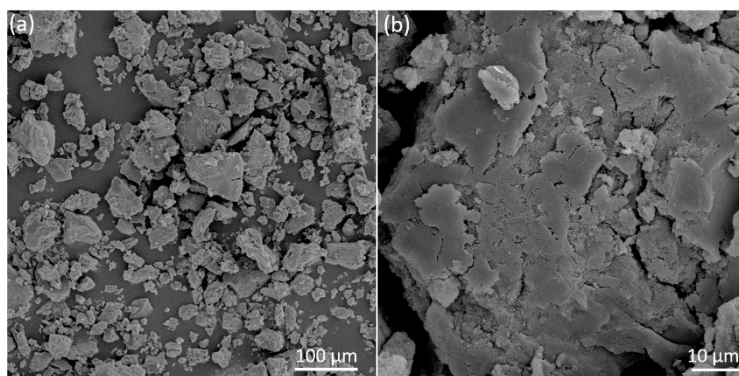

**Fig. S13** The SEM images of PANI.



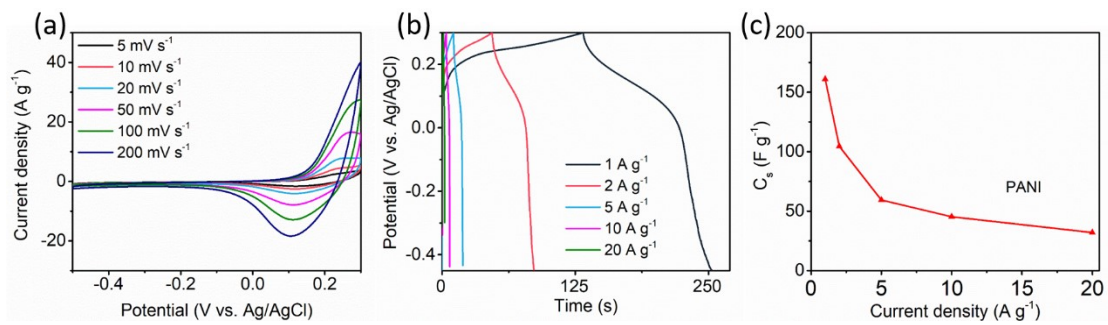

**Fig. S14** (a) CV curves, (b) GCD curves, and (c) specific capacitance of pristine PANI.

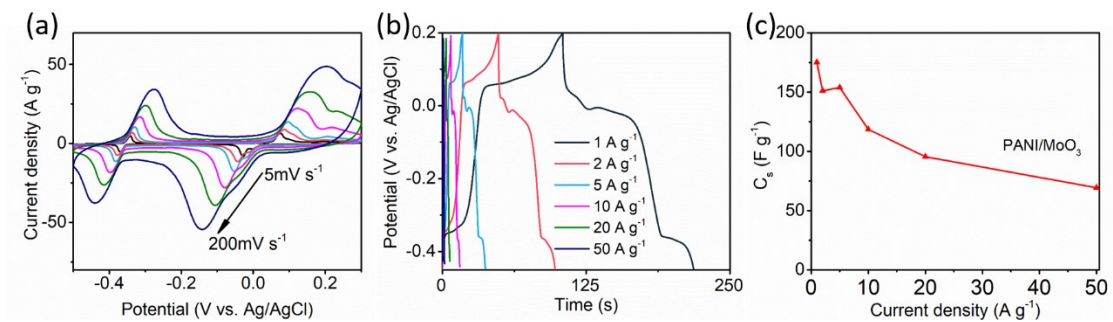

**Fig. S15** (a) CV curves, (b) GCD curves and (c) specific capacitance of physical mixture of PANI and commercial  $\text{MoO}_3$ .

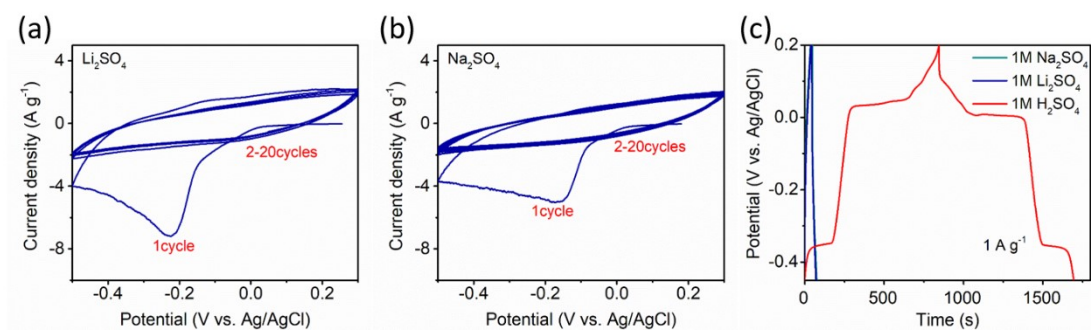

**Fig. S16** The CV curves of P100-MoO<sub>3</sub> at the first 20 cycles at electrolyte of (a) 1 M Li<sub>2</sub>SO<sub>4</sub>, (b) 1M Na<sub>2</sub>SO<sub>4</sub> and (c) the GCD curves of P100-MoO<sub>3</sub> in different electrolytes.

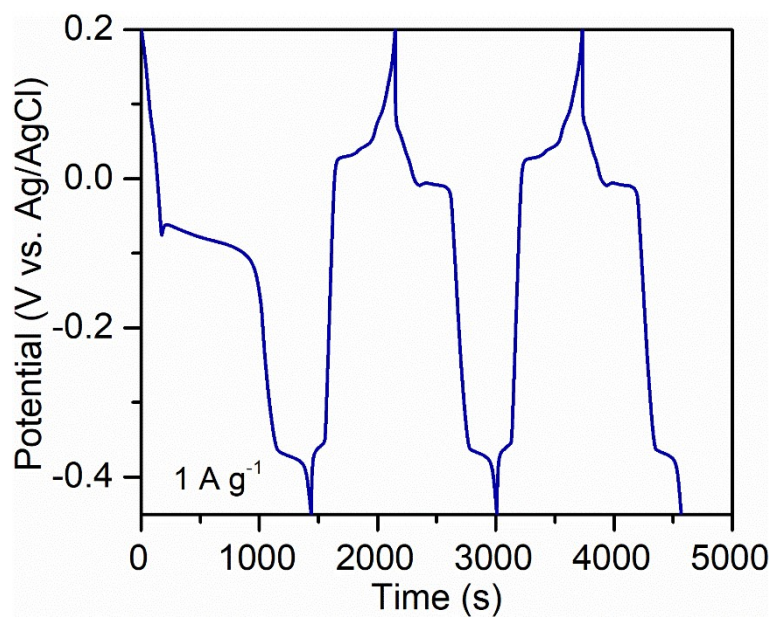

**Fig. S17** The charge/discharge curves of the first three cycles of P100-MoO<sub>3</sub> electrode at the current density of 1 A g<sup>-1</sup>.

The number of hydrogen ions ( $n$ ) as charge carriers was calculated based on the following formula:

$$n = \frac{C_s \times m \times v}{F}$$

Where  $C_s$  is the specific capacitance (F g<sup>-1</sup>),  $F$  is the Faraday constant (96,485 C mol<sup>-1</sup>),  $m$  is the molecular weight and  $v$  is the redox potential window.

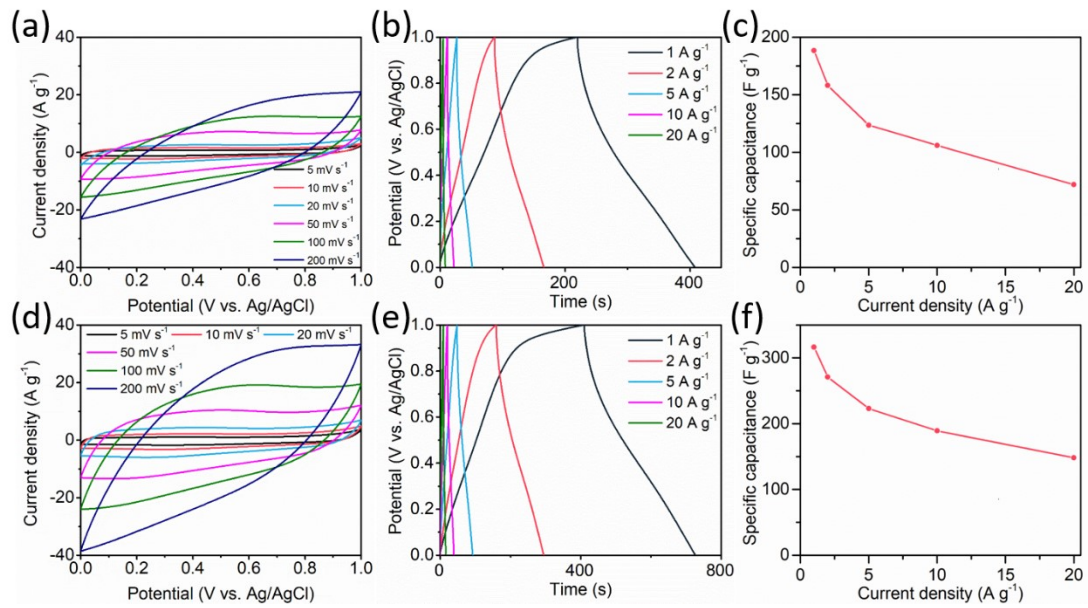

**Fig. S18** (a) CV curves, (b) GCD curves, and (c) specific capacitance of AC electrode.

(d) CV curves, (e) GCD curves, and (f) specific capacitance of NAC electrode.

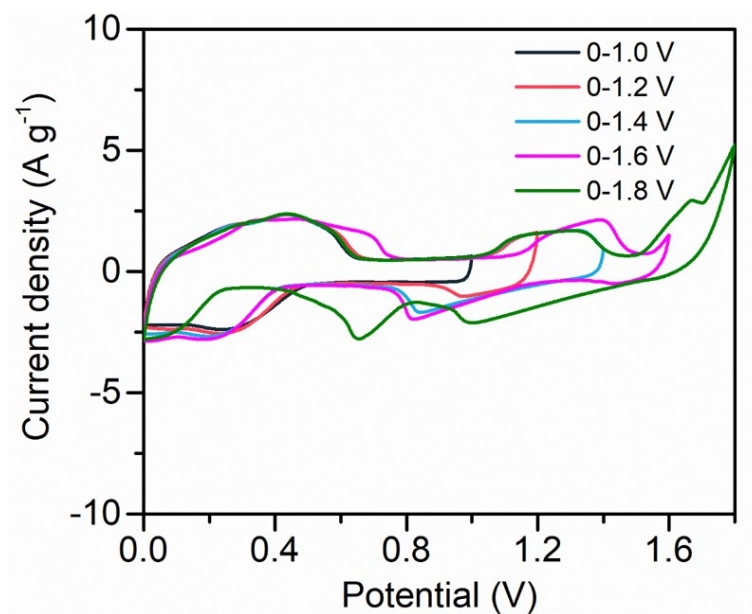

**Fig. S19** The CV curves of P100-MoO<sub>3</sub>//NAC PBSH device at different potential windows.

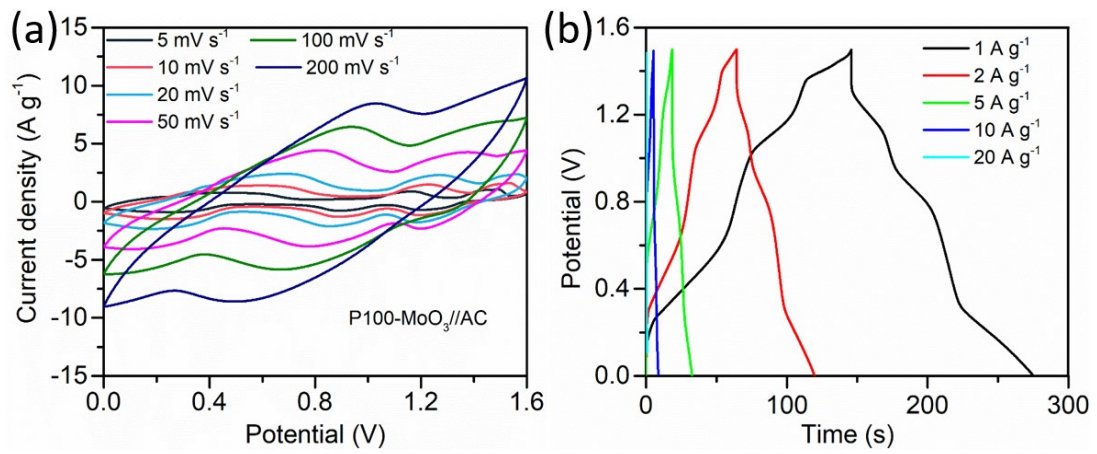

**Fig. S20** The P100-MoO<sub>3</sub>//AC PBSH device of (a) CV curves and (b) GCD curves.
